# Supplementary material
Source: ML conference proceedings conference paper supplement (https://openreview.net/forum?id=uHZ2Te266M)
Supplement: supplementary_material [file attachment]

**Supplementary Material for  
”M-Color: MLLM-Guided Diffusion  
Models for Image Colorization”**

Anonymous Submission

ICLR'25

## Additional Qualitative Results

In this supplementary material, we present additional qualitative results of our proposed method, M-Color, which demonstrates the effectiveness of MLLM-guided diffusion models in image colorization.

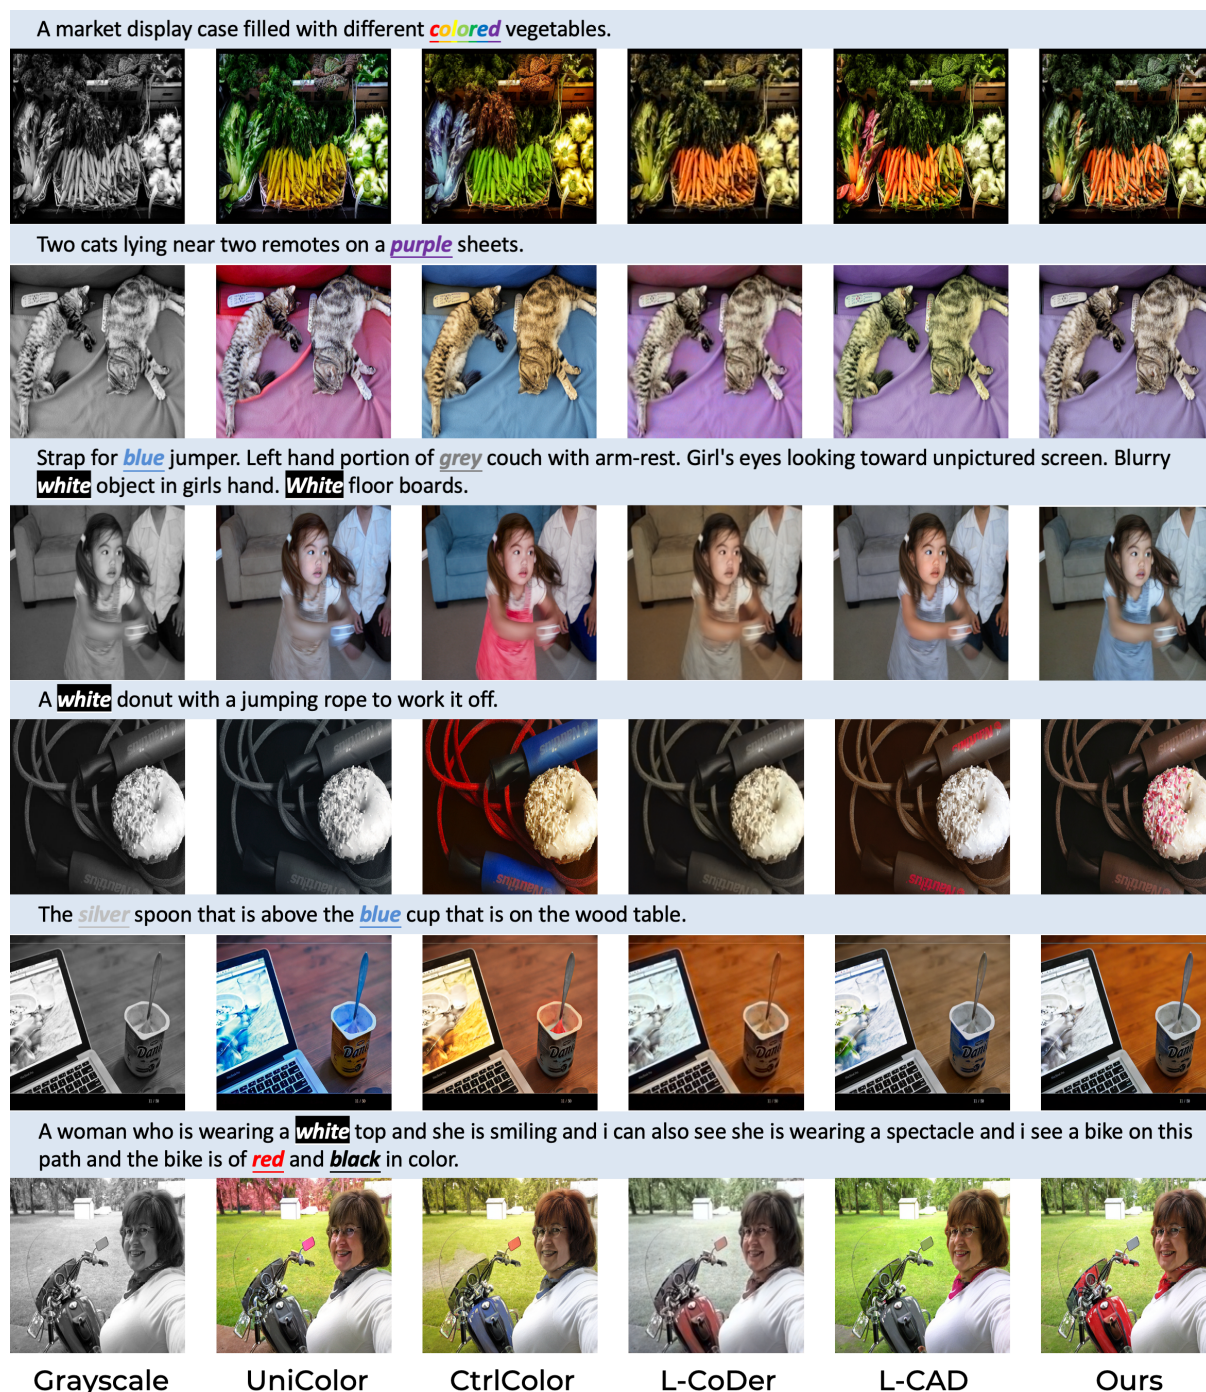

Figure 1: Additional qualitative results obtained using M-Color. These results illustrate the enhanced colorization quality achieved by our model.
